# Supplementary material for: Splay-bend nematic phases of bent colloidal silica rods induced by polydispersity
Source: Research Square preprint supplement (doi:10.21203/rs.3.rs-1594517/v1), 2022-06-09
Supplement: Supplementary file 1 [file 3454c1e97ecf53d5d26cf726.pdf]

# Supplementary Information: Splay-bend nematic phases of bent colloidal silica rods induced by polydispersity

Ramakrishna Kotni<sup>1,2</sup>, Albert Grau-Carbonell<sup>1,2</sup>, Massimiliano Chiappini<sup>1,2</sup>, Marjolein Dijkstra<sup>1</sup>, and Alfons van Blaaderen<sup>1</sup>

<sup>1</sup>Soft Condensed Matter, Debye Institute for Nanomaterials Science, Utrecht University, Princetonplein 1, Utrecht 3584 CC, The Netherlands

<sup>2</sup>Contributed equally to this work

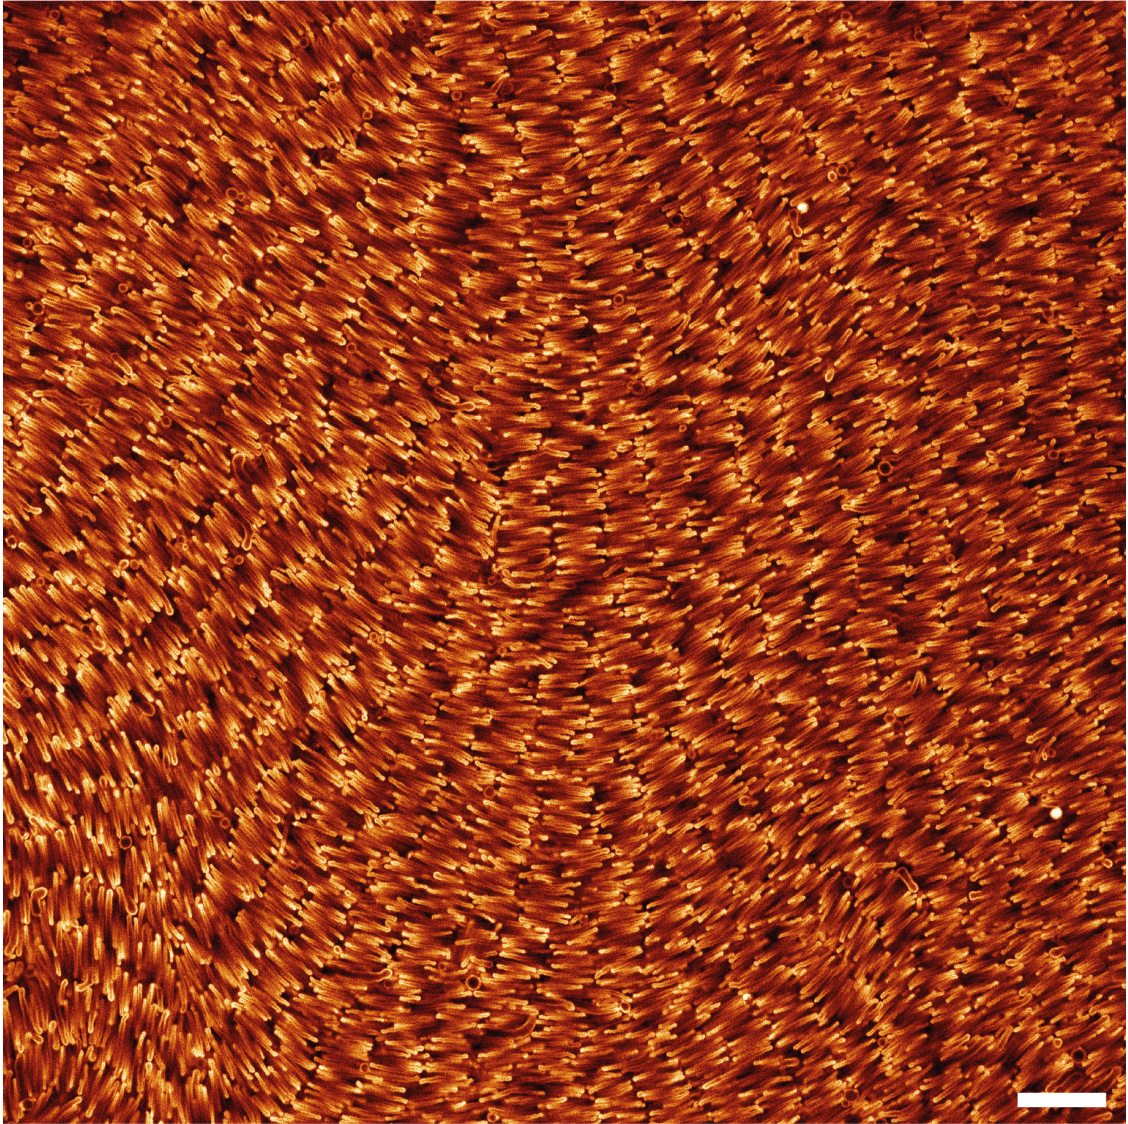

Figure 1:  $N_{SB}$  phases of BSR with particle dimensions of  $D = 490 \pm 100$  (20 %) nm,  $L_s = 2.110 \pm 270$  (13 %) nm,  $L_l = 3,190 \pm 410$  (13 %) nm and  $\alpha = 154 \pm 8$  (5 %) °. Scale bars 10  $\mu\text{m}$ .



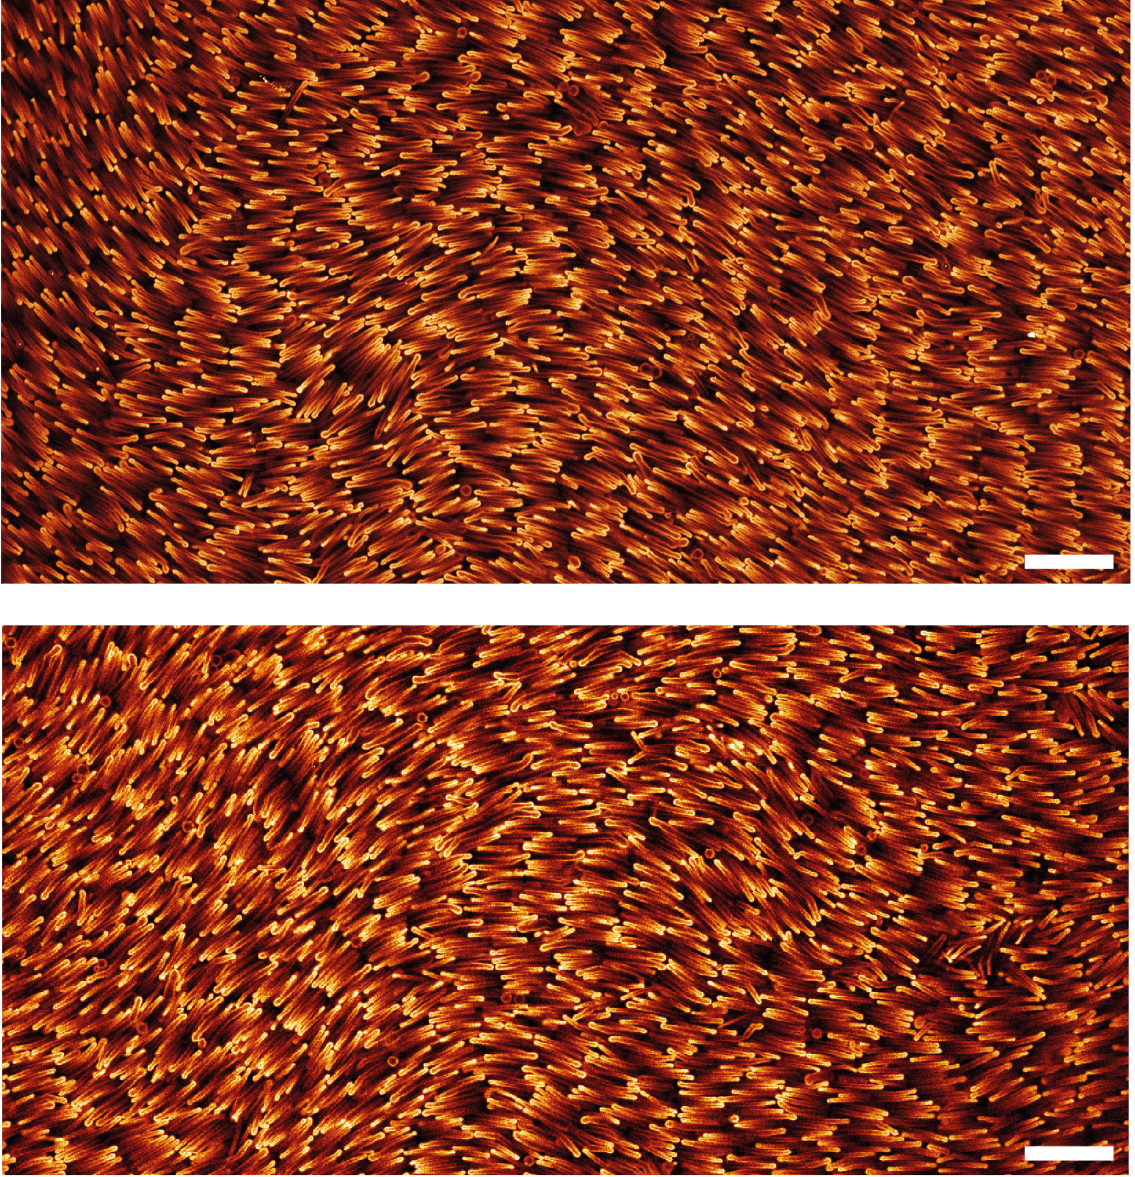

Figure 2:  $N_{SB}$  phases of BSR with particle dimensions of  $D = 490 \pm 100$  (20 %) nm,  $L_s = 2.110 \pm 270$  (13 %) nm,  $L_l = 3,190 \pm 410$  (13 %) nm) and  $\alpha = 154 \pm 8$  (5 %) °. Scale bars 10  $\mu\text{m}$ .



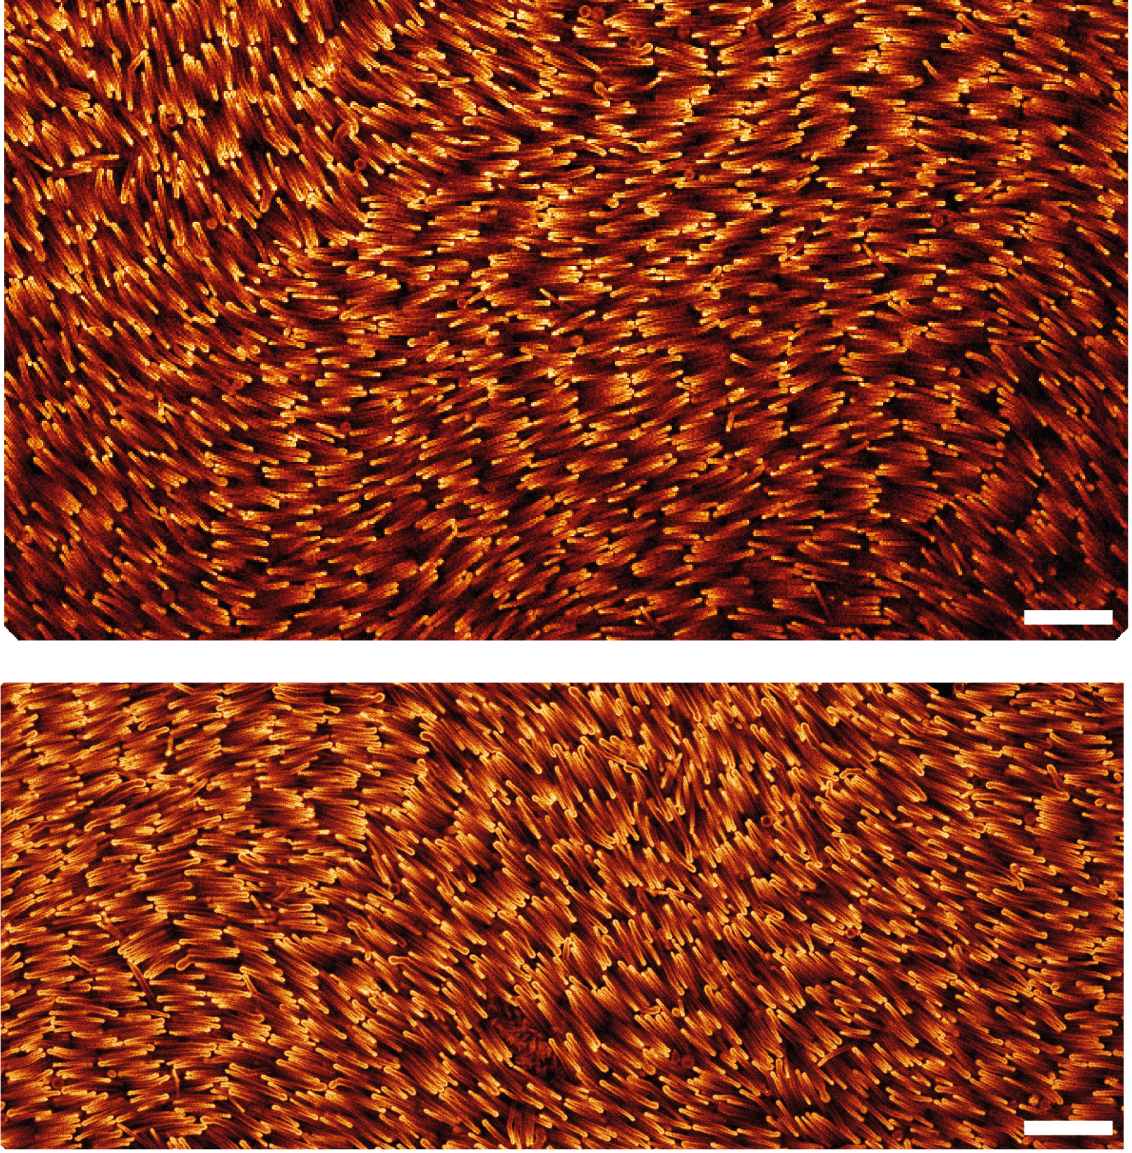

Figure 3:  $N_{SB}$  phases of BSR with particle dimensions of  $D = 490 \pm 100$  (20 %) nm,  $L_s = 2.110 \pm 270$  (13 %) nm,  $L_l = 3.190 \pm 410$  (13 %) nm) and  $\alpha = 154 \pm 8$  (5 %) °. Scale bars 10  $\mu\text{m}$ .



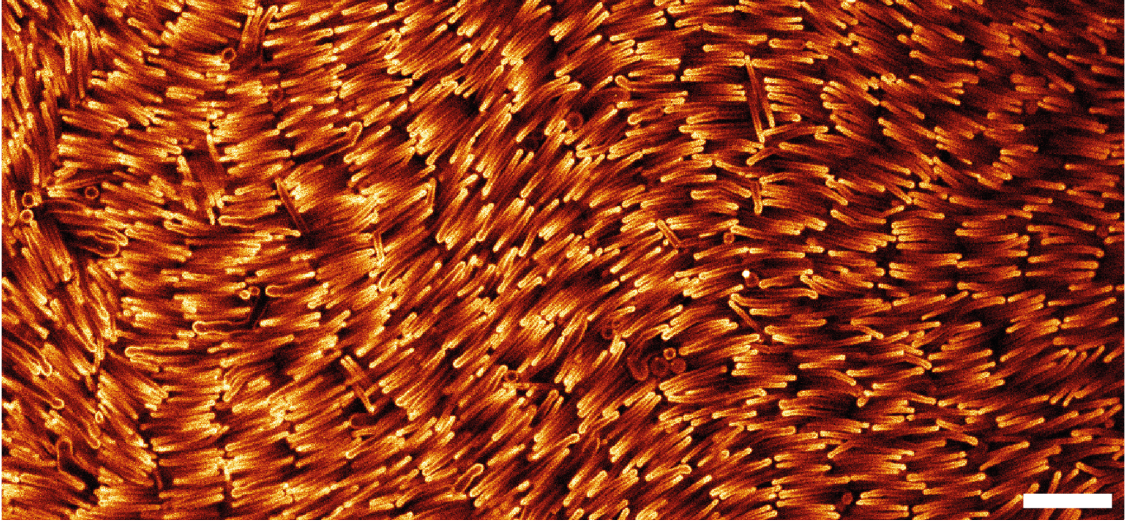

Figure 4:  $N_{SB}$  phases of BSR with particle dimensions of  $D = 490 \pm 100$  (20 %) nm,  $L_s = 2.110 \pm 270$  (13 %) nm,  $L_l = 3,190 \pm 410$  (13 %) nm) and  $\alpha = 154 \pm 8$  (5 %) °. Scale bars 5  $\mu\text{m}$ .

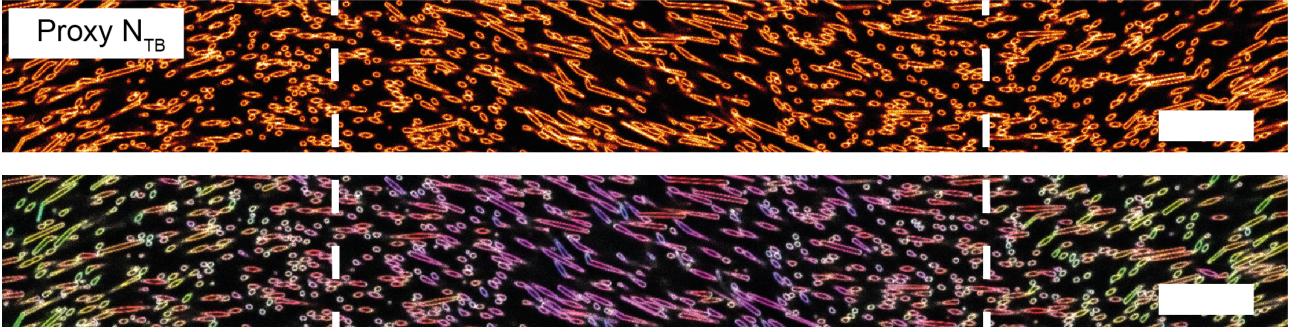

Figure 5: Proxy, computationally generated fluorescence confocal microscopy image of a dispersion of rods with a  $N_{SB}$  configuration. The dashed lines indicate the regions where the nematic director becomes perpendicular to the imaging plane. Scale bars 10  $\mu\text{m}$ .



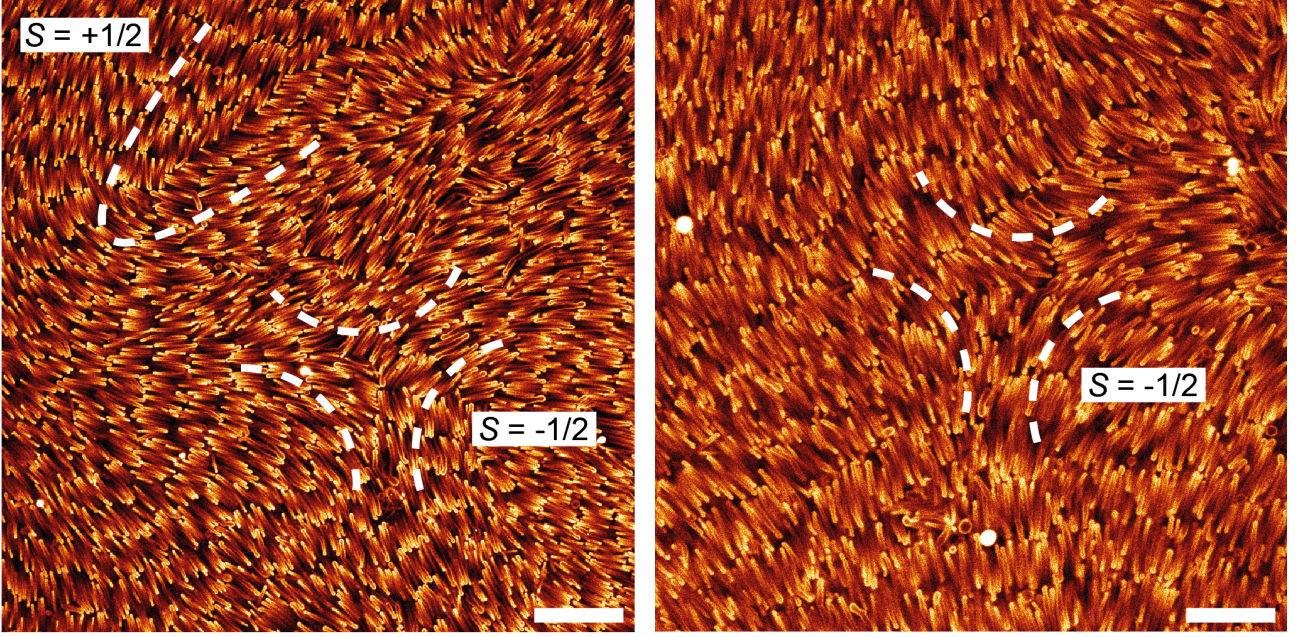

Figure 6: Fluorescence confocal microscopy imaging of line defects in nematic phases of BSR with disclination strengths  $S = \pm 1/2$ . Scale bars  $10 \mu\text{m}$ .

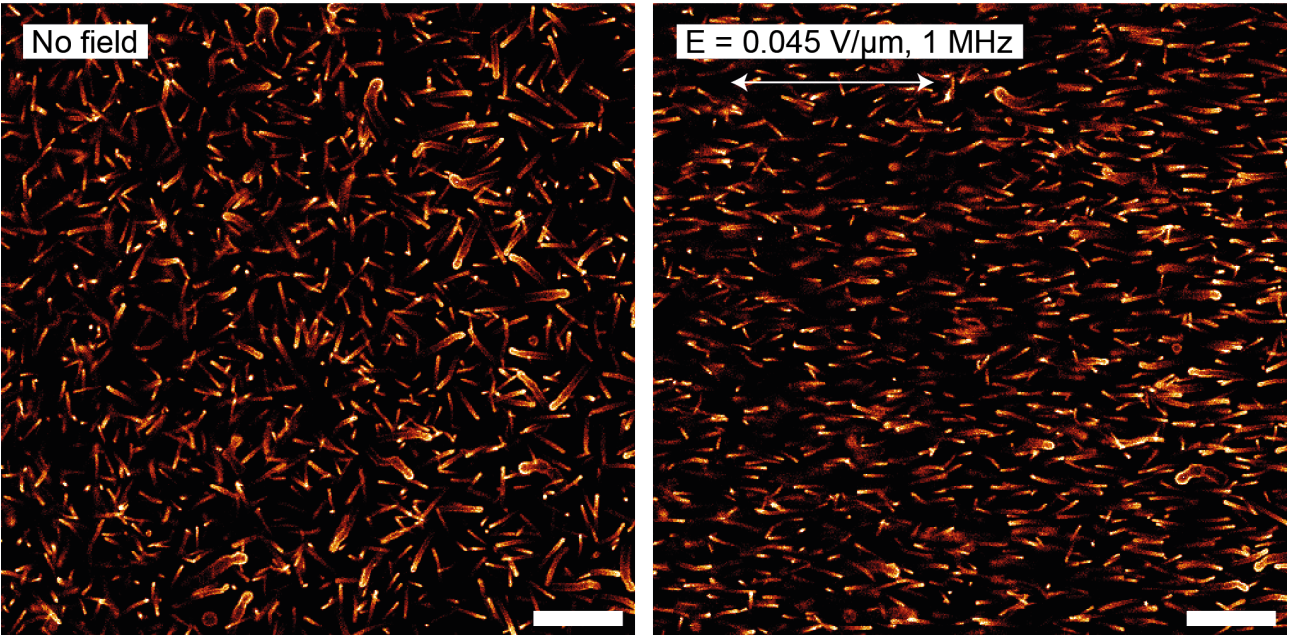

Figure 7: Fluorescence confocal microscopy imaging of very diluted suspensions of BSR. When an electric field ( $E = 0.045 \text{ V}/\mu\text{m}$ ,  $1 \text{ MHz}$ ) was applied, the orientation of the particles aligned with the external field. Scale bars  $10 \mu\text{m}$ .

#### Generation of confocal datasets of proxy $N_{SB}$ and $N_{TB}$ phases Massi: How we get the coordinates.

A 3D matrix of voxels containing the raw data of the proxy phases was created by the voxel-wise assignation of values to the voxels that would contain fluorophores for rods located at the previously obtained coordinates. The rods were assumed to have a fluorophore-rich shell, thus the voxels of the outermost parts of the rod were considered fluorescent. This dataset was considered as the ground truth, as it contained the unaltered information of the phase. This dataset was then processed with the Huygens Professional software to simulate confocal microscopy images. The dataset was convolved with the theoretical point spread function of a confocal microscope, and the z-axis of the convolution was matched with that of the experimental data with respect to the modulation of the nematic field. Then photon noise was added to achieve realistic images with a signal-to-noise ratio of 10. These data sets were then analysed exactly as the experimental datasets.



**Extraction and analysis of the  $N_{SB}$  nematic field from the orientational analysis of 2D confocal images** Massi.

**Calculation of Debye length ( $\kappa^{-1}$ )** This characteristic double-layer parameter was calculated for a monovalent electrolyte in liquid medium following:

$$\kappa^{-1} = \sqrt{\frac{\epsilon_r \epsilon_0 k_B T}{2 N_A e^2 I}} \quad (1)$$

Where  $\epsilon_r$  is the dielectric constant the solvent,  $\epsilon_0$  is the electrical permittivity of vacuum,  $k_B$  is Boltzmann's constant,  $N_A$  is Avogadro's number and  $e$  is the electron charge.
